# Supplementary material
Source: Elsevier journal article supplement (https://www.sciencedirect.com/science/article/pii/S0213911118300451)
Supplement: mmc1 [file S0213911118300451:mmc1.docx]

**Apéndice**

1. **Detalles formales sobre la metodología empleada y modelos adicionales**

En el primero de los ejercicios presentados, para cada grupo de hospitales *k* (k = 1, 2, 3, 4, CHPR) se estima el siguiente modelo *logit:*

donderepresenta la probabilidad de que el parto *i* del grupo *k* termine en cesárea, con la variable, que representa la cesárea, tomando el valor 1 en caso de cesárea y 0 en otro caso; es un vector de variables médico-obstétricas y socioeconómicas correspondiente al individuo *i* del grupo *k;*  es una constante y, junto con , el vector de coeficientes asociados a cada característica, configuran el conjunto de parámetros a estimar. Los estimadores de dichos coeficientes vienen dados por y . A continuación se predicen las probabilidades de cesárea para el total de la población de Uruguay utilizando los coeficientes de cada grupo; esto es, para cualquier parto *i,* la probabilidad de cesárea de acuerdo con los coeficientes estimados del grupo *k* vendrá dada por

Seguidamente calculamos la probabilidad media para el total de la población de Uruguay:

El error estándar de esta expresión se calcula mediante el método Delta.

A fin de posibilitar las comparaciones entre las distintas probabilidades predichas, calculamos la *ratio* entre la probabilidad predicha para cada una de las cuatro categorías y el CHPR (el que muestra una menor incidencia de cesáreas):

Los errores estándar de las *ratios* se calculan por procedimientos de remuestreo (*bootstrap* sin reposición con 500 replicaciones).

En el segundo caso, la OMS estudia la probabilidad de cesárea en una serie de centros hospitalarios de referencia, que podemos denominar *k* = OMS. De este modo, se estima el modelo siguiente:

obteniendo los estimadores y . La probabilidad predicha de cesárea para un parto *i* con características *Xi* vendrá dada por

La herramienta *online* de la OMS permite aplicar los coeficientes a cualquier muestra (como nuestros grupos de hospitales) y obtener la probabilidad media. Así, la probabilidad media de cesárea para la población atendida por el grupo de hospitales *k,* si estos se comportasen de forma idéntica a los hospitales de referencia del estudio de la OMS, sería:

donde representa la tasa de cesáreas del grupo de hospitales *k,* que puede referirse a las categorías 1, 2, 3 y 4, al CHPR o al total de la población de Uruguay. El error estándar de esta expresión se calcula con el método Delta. La expresión anterior sería la estimación que nos proporciona la herramienta *online* de la OMS y que comparamos con la tasa de cesáreas observada de cada categoría a partir de la ratio siguiente:

Por último, repetimos exactamente el mismo procedimiento, pero en lugar de tomar como referencia el modelo de la OMS fijamos como punto de comparación y herramienta para la predicción, empleando las mismas variables que el *C-model*, el CHPR. De este modo, y definiendo de forma análoga cada una de las expresiones anteriores, calculamos

La comparación, en este caso, omite lógicamente el cálculo para el propio CHPR (además, la probabilidad media y la media de las probabilidades predichas, en el modelo *logit*, coinciden, por lo que la ratio sería 1). Como en el caso anterior, los errores estándar de las *ratios* se calculan por procedimientos de remuestreo (*bootstrap* sin reposición con 500 replicaciones).

Dado que los coeficientes de los modelos *logit* estimados no son directamente interpretables, tanto en el texto principal como en este Apéndice reportamos las *odds ratios*, que pueden obtenerse como . La tabla 3 del texto recoge los resultados del modelo estimado para calcular la probabilidad predicha para cada subsistema aplicando sus coeficientes a toda la muestra de nacimientos del país. Se estimaron, asimismo, dos modelos alternativos: una primera especificación incluyendo solo los grupos de Robson y un segundo modelo que incluye las variables que determinan la clasificación de Robson de forma separada (tal como aparecen en el modelo de la OMS). Los resultados obtenidos bajo estas especificaciones alternativas son muy similares a los presentados en el artículo. Por su parte, la tabla I de este Apéndice ofrece los resultados del modelo utilizado para estimar, de forma análoga a la metodología de la OMS, la probabilidad promedio de cesárea en cada subsistema si los nacimientos producidos en dichos hospitales siguiesen las pautas del CHPR, necesaria para calcular la expresión [9].

Debe señalarse que el valor de los análisis realizados es, inicialmente, descriptivo. La omisión de variables relevantes en la probabilidad de cesárea, correlacionadas con las variables incluidas y con la categoría de hospital, implicaría la obtención de coeficientes inconsistentes y la interpretación de los resultados no sería, en dichas circunstancias, causal. No obstante, debe señalarse que el estudio se basa en el modelo de la OMS para analizar las cesáreas (e incluye algunas variables adicionales), y que incluso en el caso extremo de variables relevantes omitidas el trabajo proporciona información muy útil para identificar diferentes patrones de realización de cesáreas.

A sugerencia de uno de los evaluadores se han estimado adicionalmente dos tipos de modelos, inspirados en un trabajo previo para los Estados Unidos[[1]](#footnote-1). En primer lugar, se ha estimado un modelo único con efectos fijos por tipo de hospital. Este modelo es un caso particular de los presentados en el texto principal del trabajo, ya que solo permite que las diferencias entre hospitales se expliquen por diferencias en los niveles. De esta forma, se estima el siguiente modelo *logit*:

Las variables Cat. 1, Cat. 2 y Cat. 4 son variables binarias que toman el valor 1 en el caso de que el nacimiento se produzca en un hospital de la categoría correspondiente y 0 en otro caso. Los coeficientes δ1, δ2 y δ4 nos permiten calcular los efectos marginales u *odds ratios* que posibilitan conocer el impacto del tipo de hospital sobre la probabilidad de cesárea. Los resultados de estas estimaciones (en forma de *odds ratios*) se encuentran en la tabla II. En segundo término, se estima un modelo *logit* multinivel del siguiente tipo:

Donde el subíndice *j* hace referencia al centro hospitalario o la categoría de hospital, mientras que *μj* es una perturbación aleatoria específica por centro hospitalario *j* y *μj* ∼ *N*(0, ). Estimamos dicho modelo controlando y no controlando por características observables y considerando, en primer término, centros hospitalarios (55) y, en segundo lugar, categorías de hospitales (4). A partir de los resultados de los modelos sin y con controles calculamos la varianza de *μj* sin ninguna variable de control y con las variables de control mencionadas (grupos de Robson y resto de características clínicas y demográficas). Debido a que existían problemas de convergencia en la función de máxima verosimilitud, se estimaron los modelos empleando submuestras del 40% del total de cada grupo. Los resultados de este análisis se presentan en la tabla III.

1. **Resultados adicionales**

A continuación se presentan resultados adicionales que no han sido incluidos en el texto principal. La tabla I muestra las *odds ratios* correspondientes al modelo utilizado para estimar la probabilidad de cesárea en el CHPR, siguiendo una especificación similar a la utilizada por la OMS[[2]](#footnote-2). La tabla II, por su parte, recoge los resultados *(odds ratios)* obtenidos con un modelo econométrico de una única ecuación con efectos fijos por tipo de hospital (siguiendo la ecuación [10]). Por último, la tabla III presenta la varianza entre centros hospitalarios y entre categorías de hospital, tanto incondicionada como condicionada a las covariables, derivada del *logit* multinivel de la ecuación [11].

| **Tabla I**  Determinantes del parto por cesárea en el Centro Hospitalario Pereira Rossell (modelo *logit* con especificación alternativa de las variables determinantes de los grupos de Robson, *odds ratios*) | | |
| --- | --- | --- |
|  | *Odds ratios* | |
| Menor de 20 años | 0,732 | a |
|  | (0,032) |  |
| 35 o más años | 1,374 | a |
|  | (0,085) |  |
| 1 o 2 partos anteriores | 0,297 | a |
|  | (0,013) |  |
| 3 o más partos anteriores | 0,157 | a |
|  | (0,010) |  |
| 1 cesárea previa | 7,670 | a |
|  | (0,333) |  |
| 2 o más cesáreas previas | 217,478 | a |
|  | (40,601) |  |
| Parto múltiple | 15,085 | a |
|  | (1,913) |  |
| Inicio de parto inducido o cesárea programada | 6,825 | a |
|  | (0,230) |  |
| Presentación podálica | 21,913 | a |
|  | (2,503) |  |
| Situación transversa | 118,709 | a |
|  | (65,727) |  |
| Nacimiento prematuro | 0,889 | b |
|  | (0,051) |  |
| Placenta previa | 7,743 | a |
|  | (1,983) |  |
| Desprendimiento de placenta | 101,757 | a |
|  | (32,971) |  |
| Hipertensión | 1,288 | b |
|  | (0,132) |  |
| Preeclampsia | 1,728 | a |
|  | (0,132) |  |
| Eclampsia | 3,703 | a |
|  | (1,081) |  |
| Problema renal | 0,819 |  |
|  | (0,350) |  |
| VIH | 126,113 | a |
|  | (103,614) |  |
|  |  | |
| Pseudo-R2 | 0,36 | |
| Porcentaje de predicciones correctas (%) |  | |
| Partos totales | 83,4 | |
| Parto sin cesárea | 91,9 | |
| Parto con cesárea | 62,1 | |
| Nº de observaciones | 31,133 | |
| VIH: virus de la inmunodeficiencia humana.  aSignificativamente distinto de 1 al 1%.  bSignificativo al 5%.  Nota: entre paréntesis se muestran los errores estándar robustos a la heteroscedasticidad. El modelo incluye efectos fijos por año y una constante. Las categorías de referencia omitidas son edad entre 20 y 35 años, no haber tenido partos anteriormente, no haber experimentado ninguna cesárea, inicio de parto espontáneo y presentación cefálica. El porcentaje de predicciones correctas se ha calculado asumiendo una probabilidad de corte de 0,5. | | |

| **Tabla II**  Determinantes del parto por cesárea en Uruguay (modelo *logit* con grupos de Robson y otras variables, efectos marginales y *odds ratios*) | | |
| --- | --- | --- |
|  | *Odds ratios* | |
| Grupo Robson 1 | 5,925 | a |
|  | (0,125) |  |
| Grupo Robson 2 | 28,010 | a |
|  | (0,646) |  |
| Grupo Robson 4 | 7,284 | a |
|  | (0,176) |  |
| Grupo Robson 5 | 42,167 | a |
|  | (0,931) |  |
| Grupo Robson 6 | 233,488 | a |
|  | (19,642) |  |
| Grupo Robson 7 | 163,991 | a |
|  | (12,064) |  |
| Grupo Robson 8 | 145,040 | a |
|  | (8,314) |  |
| Grupo Robson 9 | 254,384 | a |
|  | (50,898) |  |
| Grupo Robson 10 | 10,763 | a |
|  | (0,271) |  |
| Menor de 20 años | 0,683 | a |
|  | (0,012) |  |
| 35 o más años | 1,413 | a |
|  | (0,025) |  |
| Casada | 1,096 | a |
|  | (0,016) |  |
| Soltera | 0,935 | a |
|  | (0,016) |  |
| Otro estado civil | 0,921 |  |
|  | (0,060) |  |
| Educación primaria o inferior | 0,862 | a |
|  | (0,014) |  |
| Educación universitaria | 1,041 | b |
|  | (0,017) |  |
| Placenta previa | 10,861 | a |
|  | (1,532) |  |
| Desprendimiento de placenta | 60,133 | a |
|  | (11,510) |  |
| Hipertensión | 1,556 | a |
|  | (0,065) |  |
| Preeclampsia | 3,223 | a |
|  | (0,119) |  |
| Eclampsia | 4,017 | a |
|  | (0,759) |  |
| Problema renal | 1,462 | b |
|  | (0,237) |  |
| VIH | 28,437 | a |
|  | (9,828) |  |
| Categoría 1 | 1,081 | a |
|  | (0,023) |  |
| Categoría 2 | 1,129 | a |
|  | (0,024) |  |
| Categoría 4 | 1,189 | a |
|  | (0,025) |  |
| Pseudo-R2 | 0,31 | |
| Porcentaje de predicciones correctas (%) |  | |
| Partos totales | 77,8 | |
| Parto sin cesárea | 83,9 | |
| Parto con cesárea | 69,6 | |
| Nº de observaciones | 190.847 | |
| VIH: virus de la inmunodeficiencia humana.  aSignificativamente distinto de 1 al 1%.  bSignificativo al 5%.  Nota: entre paréntesis se muestran los errores estándar robustos a la heteroscedasticidad. El modelo incluye efectos fijos por año y una constante. Las categorías de referencia omitidas son la pertenencia al grupo 3 de Robson, edad entre 20 y 35 años, unión libre y educación secundaria. El porcentaje de predicciones correctas se ha calculado asumiendo una probabilidad de corte de 0,5. | | |

| **Tabla III**  Varianza incondicional y condicionada resultado de un modelo *logit* multinivel entre hospitales y categorías de hospital en Uruguay | | |
| --- | --- | --- |
|  | Entre centros hospitalarios | Entre categorías de hospitales |
| Sin variables de control | 0,175 | 0,149 |
|  | (0,030) | (0,066) |
| Con variables de control | 0,089 | 0,072 |
|  | (0,016) | (0,034) |
| Nota: entre paréntesis se muestran los errores estándar robustos a la heteroscedasticidad. El modelo con variables de control incluye los mismos regresores que el modelo presentado en el texto principal del artículo. | | |

1. Cáceres IA, Arcaya M, Declercq E, et al. Hospital differences in cesarean deliveries in Massachusetts (US) 2004-2006: the case against case-mix artifact. PloS One. 2013;8:e57817. [↑](#footnote-ref-1)
2. Souza JP, Betran AP, Dumont A, et al. A global reference for caesarean section rates (C‐Model): a multicountry cross‐sectional study. BJOG. 2016;123:427-36. [↑](#footnote-ref-2)
